# Supplementary material for: Complement inhibition attenuates acute kidney injury after ischemia-reperfusion and limits progression to renal fibrosis in mice
Source: PubMed Central journal article supplement (PMC5568291; doi:10.1371/journal.pone.0183701), 2017-08-23

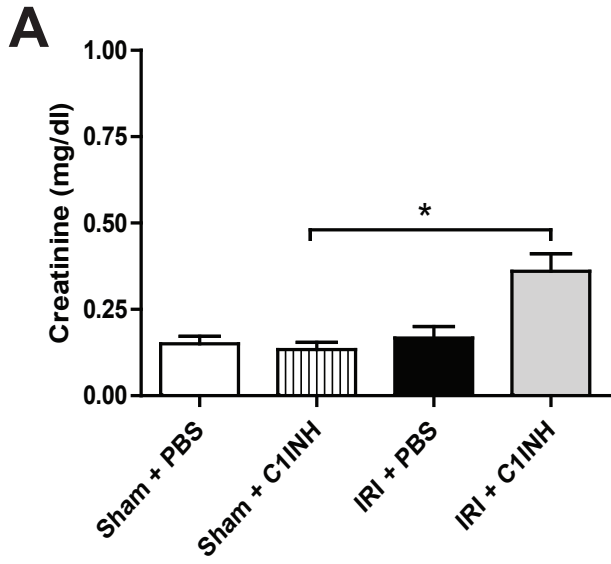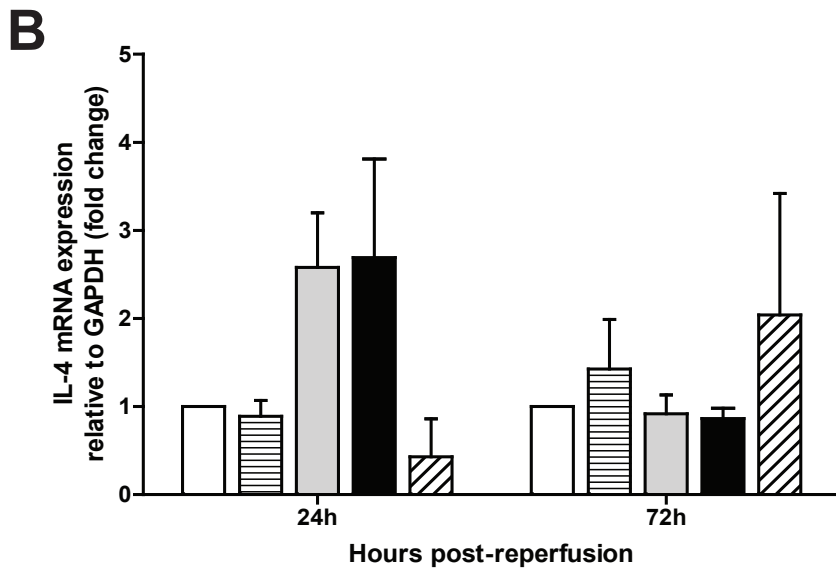

Supplement: pone.0183701.s001.pdf [file pone.0183701.s001.pdf]
